# Supplementary material
Source: publisher figshare collection journal article supplement (https://acs.figshare.com/ndownloader/files/6005298)
Supplement: Supplementary file 1 [file 6005298]

## Sheet: S-2a
Group	Acca	Modificationsb	Initiator Mc	Sequenced	Acetylated AAe	Follow AA N-acetylf	Unmodified AAg	Follow AA unmodifiedh	Follow AA -Arg/Ni	Arg/Nj	IEFk	Unfractionatedl	N-acetylation-Uniprotm	Initiator Methionine Uniprotn	Novel N-termo	Novel N-acetylp
2	O60220	Acetyl (Protein N-term)	Non-cleaved	MDSSSSSSAAGLGAVDPQLQHFIEVETQK	M	D	-	-	-	-	-	x	-	-	-	x
2	O95639	Acetyl (Protein N-term)	Non-cleaved	MQEIIASVDHIK	M	Q	-	-	-	-	x	-	-	-	-	x
2	Q13287	Acetyl (Protein N-term)	Non-cleaved	MEADKDDTQQILK	M	E	-	-	-	-	x	-	-	-	-	x
2	Q8NEM7	Acetyl (Protein N-term)	Non-cleaved	MQQALELALDR	M	Q	-	-	-	-	x	-	-	-	-	x
2	Q9HBM1	Acetyl (Protein N-term)	Non-cleaved	MVEDELALFDK	M	V	-	-	-	-	x	x	-	-	-	x
4	O00268	Acetyl (Protein N-term)	cleaved	AAGSDLLDEVFFNSEVDEK	A	A	-	-	-	-	x	-	-	-	x	x
4	O75534	Acetyl (Protein N-term)	cleaved	SFDPNLLHNNGHNGYPNGTSAALR	S	F	-	-	-	-	x	-	-	-	x	x
4	P20338	Acetyl (Protein N-term)	cleaved	SQTAMSETYDFLFK	S	Q	-	-	-	-	x	-	-	-	x	x
4	P32780	Acetyl (Protein N-term)	cleaved	ATSSEEVLLIVK	A	T	-	-	-	-	x	-	-	-	x	x
4	P34932	Acetyl (Protein N-term)	cleaved	SVVGIDLGFQSCYVAVAR	S	V	-	-	-	-	x	x	-	-	x	x
4	P54725	Acetyl (Protein N-term)	cleaved	AVTITLK	A	V	-	-	-	-	x	-	-	-	x	x
4	Q13435	Acetyl (Protein N-term)	cleaved	ATEHPEPPKAELQLPPPPPPGHYGAWAAQELQAK	A	T	-	-	-	-	x	-	-	-	x	x
4	Q13526	Acetyl (Protein N-term)	cleaved	ADEEKLPPGWEK	A	D	-	-	-	-	x	-	-	-	x	x
4	Q13948	Acetyl (Protein N-term)	cleaved	AANVGSMFQYWK	A	A	-	-	-	-	x	-	-	-	x	x
4	Q15542	Acetyl (Protein N-term)	cleaved	AALAEEQTEVAVK	A	A	-	-	-	-	x	-	-	-	x	x
4	Q5VZF2	Acetyl (Protein N-term)	cleaved	ALNVAPVR	A	L	-	-	-	-	x	-	-	-	x	x
4	Q8NDX6	Acetyl (Protein N-term)	cleaved	AQASLLACEGLAGVSLVPTAASK	A	Q	-	-	-	-	x	-	-	-	x	x
4	Q8TCE6	Acetyl (Protein N-term)	cleaved	AAAEVADTQLMLGVGLIEK	A	A	-	-	-	-	x	-	-	-	x	x
4	Q8WU76	Acetyl (Protein N-term)	cleaved	SASGVLSFTQQGWEQVLAK	S	A	-	-	-	-	x	-	-	-	x	x
4	Q8WUK0	Acetyl (Protein N-term)	cleaved	AATALLEAGLAR	A	A	-	-	-	-	x	x	-	-	x	x
4	Q96CB8	Acetyl (Protein N-term)	cleaved	AATVNLELDPIFLK	A	A	-	-	-	-	x	-	-	-	x	x
4	Q96FN4	Acetyl (Protein N-term)	cleaved	AHIPSGGAPAAGAAPMGPQYCVCK	A	H	-	-	-	-	x	-	-	-	x	x
4	Q96MW1	Acetyl (Protein N-term)	cleaved	AAPSEVAAIAPGEGDGGGGGFGSWLDGR	A	A	-	-	-	-	x	-	-	-	x	x
4	Q96MX6	Acetyl (Protein N-term)	cleaved	SAFEKPQIIAHIQK	S	A	-	-	-	-	x	-	-	-	x	x
4	Q96P48	Acetyl (Protein N-term)	cleaved	AEAGDAALSVAEWLR	A	E	-	-	-	-	x	x	-	-	x	x
4	Q96RE7	Acetyl (Protein N-term)	cleaved	AQTLQMEIPNFGNSILECLNEQR	A	Q	-	-	-	-	x	-	-	-	x	x
4	Q9BRZ2	Acetyl (Protein N-term)	cleaved	VSHGSSPSLLEALSSDFLACK	V	S	-	-	-	-	x	-	-	-	x	x
4	Q9NQX3	Acetyl (Protein N-term)	cleaved	ATEGMILTNHDHQIR	A	T	-	-	-	-	x	-	-	-	x	x
4	Q9NR56	Acetyl (Protein N-term)	cleaved	AVSVTPIR	A	V	-	-	-	-	x	-	-	-	x	x
4	Q9NW68	Acetyl (Protein N-term)	cleaved	AEGEDVGWWR	A	E	-	-	-	-	x	-	-	-	x	x
4	Q9UJY4	Acetyl (Protein N-term)	cleaved	AATAVAAAVAGTESAQGPPGPAASLELWLNK	A	A	-	-	-	-	x	-	-	-	x	x
4	Q9Y2P8	Acetyl (Protein N-term)	cleaved	ATQAHSLSYAGCNFLR	A	T	-	-	-	-	x	-	-	-	x	x
4	Q9Y5K5	Acetyl (Protein N-term)	cleaved	TGNAGEWCLMESDPGVFTELIK	T	G	-	-	-	-	x	-	-	-	x	x
4	Q9Y6Q5	Acetyl (Protein N-term)	cleaved	SASAVFILDVK	S	A	-	-	-	-	x	-	-	-	x	x
7	Q96S52	Acetyl (Protein N-term)	cleaved	AAAGAAATHLEVAR	A	A	-	-	-	-	x	-	-	Removed	-	x
1	Q14974	Acetyl (Protein N-term)	Non-cleaved	MELITILEK	M	E	-	-	-	-	x	x	Position 1	-	-	-
1	Q99460	Acetyl (Protein N-term)	Non-cleaved	MITSAAGIISLLDEDEPQLK	M	I	-	-	-	-	-	x	Position 1	-	-	-
1	Q96HQ2	Acetyl (Protein N-term)	Non-cleaved	MVGGEAAAAVEELVSGVR	M	V	-	-	-	-	x	x	Position 1	-	-	-
1	P50402	Acetyl (Protein N-term)	Non-cleaved	MDNYADLSDTELTTLLR	M	D	-	-	-	-	x	x	Position 1	-	-	-
1	Q9NQC3	Acetyl (Protein N-term)	Non-cleaved	MEDLDQSPLVSSSDSPPRPQPAFK	M	E	-	-	-	-	x	-	Position 1	-	-	-
1	O00161	Acetyl (Protein N-term)	Non-cleaved	MDNLSSEEIQQR	M	D	-	-	-	-	x	-	Position 1	-	-	-
1	P06748	Acetyl (Protein N-term)	Non-cleaved	MEDSMDMDMSPLRPQNYLFGCELK	M	E	-	-	-	-	x	-	Position 1	-	-	-
1	O43399	Acetyl (Protein N-term)	Non-cleaved	MDSAGQDINLNSPNK	M	D	-	-	-	-	x	-	Position 1	-	-	-
1	Q14566	Acetyl (Protein N-term)	Non-cleaved	MDLAAAAEPGAGSQHLEVR	M	D	-	-	-	-	x	-	Position 1	-	-	-
1	P63220	Acetyl (Protein N-term)	Non-cleaved	MQNDAGEFVDLYVPR	M	Q	-	-	-	-	x	x	Position 1	-	-	-
1	Q9Y5Y2	Acetyl (Protein N-term)	Non-cleaved	MEAAAEPGNLAGVR	M	E	-	-	-	-	x	-	Position 1	-	-	-
1	P49588	Acetyl (Protein N-term)	Non-cleaved	MDSTLTASEIR	M	D	-	-	-	-	x	-	Position 1	-	-	-
1	O95373	Acetyl (Protein N-term)	Non-cleaved	MDPNTIIEALR	M	D	-	-	-	-	x	x	Position 1	-	-	-
1	P17987	Acetyl (Protein N-term)	Non-cleaved	MEGPLSVFGDR	M	E	-	-	-	-	x	x	Position 1	-	-	-
1	Q15050	Acetyl (Protein N-term)	Non-cleaved	MEGQSVEELLAK	M	E	-	-	-	-	x	-	Position 1	-	-	-
1	Q8TEX9	Acetyl (Protein N-term)	Non-cleaved	MESAGLEQLLR	M	E	-	-	-	-	x	-	Position 1	-	-	-
1	Q12874	Acetyl (Protein N-term)	Non-cleaved	METILEQQR	M	E	-	-	-	-	x	x	Position 1	-	-	-
1	P55060	Acetyl (Protein N-term)	Non-cleaved	MELSDANLQTLTEYLK	M	E	-	-	-	-	x	x	Position 1	-	-	-
1	P26599	Acetyl (Protein N-term)	Non-cleaved	MDGIVPDIAVGTK	M	D	-	-	-	-	x	-	Position 1	-	-	-
1	P43686	Acetyl (Protein N-term)	Non-cleaved	MEEIGILVEK	M	E	-	-	-	-	x	x	Position 1	-	-	-
1	O00273	Acetyl (Protein N-term)	Non-cleaved	MEVTGDAGVPESGEIR	M	E	-	-	-	-	x	-	Position 1	-	-	-
1	O43592	Acetyl (Protein N-term)	Non-cleaved	MDEQALLGLNPNADSDFR	M	D	-	-	-	-	x	x	Position 1	-	-	-
1	P54136	Acetyl (Protein N-term)	Non-cleaved	MDVLVSECSAR	M	D	-	-	-	-	x	-	Position 1	-	-	-
1	P53384	Acetyl (Protein N-term)	Non-cleaved	MEEVPHDCPGADSAQAGR	M	E	-	-	-	-	x	-	Position 1	-	-	-
1	P61326	Acetyl (Protein N-term)	Non-cleaved	MESDFYLR	M	E	-	-	-	-	x	-	Position 1	-	-	-
1	Q9GZU8	Acetyl (Protein N-term)	Non-cleaved	MDGGDDGNLIIK	M	D	-	-	-	-	x	-	Position 1	-	-	-
1	P04632	Acetyl (Protein N-term)	Non-cleaved	MFLVNSFLK	M	F	-	-	-	-	x	x	Position 1	-	-	-
1	P63172	Acetyl (Protein N-term)	Non-cleaved	MEDYQAAEETAFVVDEVSNIVK	M	E	-	-	-	-	-	x	Position 1	-	-	-
1	Q92734	Acetyl (Protein N-term)	Non-cleaved	MNGQLDLSGK	M	N	-	-	-	-	x	-	Position 1	-	-	-
1	P49327	Acetyl (Protein N-term)	Non-cleaved	MEEVVIAGMSGK	M	E	-	-	-	-	x	-	Position 1	-	-	-
1	P31948	Acetyl (Protein N-term)	Non-cleaved	MEQVNELKEK	M	E	-	-	-	-	x	x	Position 1	-	-	-
1	P61923	Acetyl (Protein N-term)	Non-cleaved	MEALILEPSLYTVK	M	E	-	-	-	-	x	x	Position 1	-	-	-
1	O00429	Acetyl (Protein N-term)	Non-cleaved	MEALIPVINK	M	E	-	-	-	-	x	-	Position 1	-	-	-
1	P04080	Acetyl (Protein N-term)	Non-cleaved	MMCGAPSATQPATAETQHIADQVR	M	M	-	-	-	-	x	x	Position 1	-	-	-
1	P61165	Acetyl (Protein N-term)	Non-cleaved	MELEAMSR	M	E	-	-	-	-	x	x	Position 1	-	-	-
1	P61978	Acetyl (Protein N-term)	Non-cleaved	METEQPEETFPNTETNGEFGK	M	E	-	-	-	-	x	x	Position 1	-	-	-
1	Q9C005	Acetyl (Protein N-term)	Non-cleaved	MEPEQMLEGQTQVAENPHSEYGLTDNVER	M	E	-	-	-	-	x	-	Position 1	-	-	-
1	O43504	Acetyl (Protein N-term)	Non-cleaved	MEATLEQHLEDTMK	M	E	-	-	-	-	x	-	Position 1	-	-	-
1	Q9Y5L4	Acetyl (Protein N-term)	Non-cleaved	MEGGFGSDFGGSGSGK	M	E	-	-	-	-	x	x	Position 1	-	-	-
1	P62258	Acetyl (Protein N-term)	Non-cleaved	MDDREDLVYQAK	M	D	-	-	-	-	x	x	Position 1	-	-	-
1	Q9HD42	Acetyl (Protein N-term)	Non-cleaved	MDDTLFQLK	M	D	-	-	-	-	x	x	Position 1	-	-	-
1	P02795	Acetyl (Protein N-term)	Non-cleaved	MDPNCSCAAGDSCTCAGSCK	M	D	-	-	-	-	-	x	Position 1	-	-	-
1	Q00613	Acetyl (Protein N-term)	Non-cleaved	MDLPVGPGAAGPSNVPAFLTK	M	D	-	-	-	-	-	x	Position 1	-	-	-
1	Q96HR8	Acetyl (Protein N-term)	Non-cleaved	MEVVEAAAAQLETLK	M	E	-	-	-	-	-	x	Position 1	-	-	-
1	Q99504	Acetyl (Protein N-term)	Non-cleaved	MEEEQDLPEQPVKK	M	E	-	-	-	-	x	-	Position 1	-	-	-
1	O60784	Acetyl (Protein N-term)	Non-cleaved	MDFLLGNPFSSPVGQR	M	D	-	-	-	-	x	x	Position 1	-	-	-
1	P40121	Acetyl (Protein N-term)	Non-cleaved	MYTAIPQSGSPFPGSVQDPGLHVWR	M	Y	-	-	-	-	x	x	Position 1	-	-	-
1	Q7Z4W1	Acetyl (Protein N-term)	Non-cleaved	MELFLAGR	M	E	-	-	-	-	x	x	Position 1	-	-	-
1	P60059	Acetyl (Protein N-term)	Non-cleaved	MDQVMQFVEPSR	M	D	-	-	-	-	x	x	Position 1	-	-	-
1	P55884	Acetyl (Protein N-term)	Non-cleaved	MQDAENVAVPEAAEER	M	Q	-	-	-	-	x	-	Position 1	-	-	-
1	O75915	Acetyl (Protein N-term)	Non-cleaved	MDVNIAPLR	M	D	-	-	-	-	x	-	Position 1	-	-	-
1	Q05209	Acetyl (Protein N-term)	Non-cleaved	MEQVEILR	M	E	-	-	-	-	x	-	Position 1	-	-	-
1	Q13045	Acetyl (Protein N-term)	Non-cleaved	MEATGVLPFVR	M	E	-	-	-	-	x	-	Position 1	-	-	-
1	Q9NR50	Acetyl (Protein N-term)	Non-cleaved	MEFQAVVMAVGGGSR	M	E	-	-	-	-	x	-	Position 1	-	-	-
1	P50453	Acetyl (Protein N-term)	Non-cleaved	METLSNASGTFAIR	M	E	-	-	-	-	x	-	Position 1	-	-	-
1	Q8WYA6	Acetyl (Protein N-term)	Non-cleaved	MDVGELLSYQPNR	M	D	-	-	-	-	x	-	Position 1	-	-	-
1	Q9Y6D9	Acetyl (Protein N-term)	Non-cleaved	MEDLGENTMVLSTLR	M	E	-	-	-	-	x	-	Position 1	-	-	-
1	Q9BW60	Acetyl (Protein N-term)	Non-cleaved	MEAVVNLYQEVMK	M	E	-	-	-	-	x	x	Position 1	-	-	-
1	P35250	Acetyl (Protein N-term)	Non-cleaved	MEVEAVCGGAGEVEAQDSDPAPAFSK	M	E	-	-	-	-	x	-	Position 1	-	-	-
1	P43490	Acetyl (Protein N-term)	Non-cleaved	MNPAAEAEFNILLATDSYK	M	N	-	-	-	-	x	x	Position 1	-	-	-
1	Q13795	Acetyl (Protein N-term)	Non-cleaved	MYTLLSGLYK	M	Y	-	-	-	-	-	x	Position 1	-	-	-
1	Q9NYF3	Acetyl (Protein N-term)	Non-cleaved	MITLITEQLQK	M	I	-	-	-	-	x	-	Position 1	-	-	-
1	Q9Y3E0	Acetyl (Protein N-term)	Non-cleaved	MISLTDTQK	M	I	-	-	-	-	x	-	Position 1	-	-	-
1	Q9UI09	Acetyl (Protein N-term)	Non-cleaved	MELVQVLK	M	E	-	-	-	-	x	x	Position 1	-	-	-
1	P08195	Acetyl (Protein N-term)	Non-cleaved	MELQPPEASIAVVSIPR	M	E	-	-	-	-	x	-	Position 1	-	-	-
1	Q06787	Acetyl (Protein N-term)	Non-cleaved	MEELVVEVR	M	E	-	-	-	-	x	-	Position 1	-	-	-
1	Q15365	Acetyl (Protein N-term)	Non-cleaved	MDAGVTESGLNVTLTIR	M	D	-	-	-	-	x	x	Position 1	-	-	-
1	P49711	Acetyl (Protein N-term)	Non-cleaved	MEGDAVEAIVEESETFIK	M	E	-	-	-	-	-	x	Position 1	-	-	-
1	Q8N556	Acetyl (Protein N-term)	Non-cleaved	MEELIVELR	M	E	-	-	-	-	x	x	Position 1	-	-	-
1	Q96NB2	Acetyl (Protein N-term)	Non-cleaved	MEADLSGFNIDAPR	M	E	-	-	-	-	x	-	Position 1	-	-	-
1	Q9BSY4	Acetyl (Protein N-term)	Non-cleaved	MQAALEVTAR	M	Q	-	-	-	-	x	x	Position 1	-	-	-
1	Q9BZD4	Acetyl (Protein N-term)	Non-cleaved	METLSFPR	M	E	-	-	-	-	x	-	Position 1	-	-	-
1	Q9NYP7	Acetyl (Protein N-term)	Non-cleaved	MEHFDASLSTYFK	M	E	-	-	-	-	x	-	Position 1	-	-	-
1	Q9H0U4	Acetyl (Protein N-term)	Non-cleaved	MNPEYDYLFK	M	N	-	-	-	-	x	-	Position 1	-	-	-
1	P56945	Acetyl (Protein N-term)	Non-cleaved	MNHLNVLAK	M	N	-	-	-	-	x	-	Position 1	-	-	-
1	Q9BQE5	Acetyl (Protein N-term)	Non-cleaved	MNPESSIFIEDYLK	M	N	-	-	-	-	x	-	Position 1	-	-	-
1	Q6ZVM7	Acetyl (Protein N-term)	Non-cleaved	MEFLLGNPFSTPVGQCLEK	M	E	-	-	-	-	-	x	Position 1	-	-	-
3	P62937	Acetyl (Protein N-term)	Non-cleaved	MVNPTVFFDIAVDGEPLGR	M	V	-	-	-	-	x	x	Position 1	Removed - alternate	-	-
3	P31943	Acetyl (Protein N-term)	Non-cleaved	MMLGTEGGEGFVVK	M	M	-	-	-	-	x	x	Position 1	Removed - alternate	-	-
3	P46782	Acetyl (Protein N-term)	Non-cleaved	MTEWETAAPAVAETPDIK	M	T	-	-	-	-	x	x	Position 1	Removed - alternate	-	-
3	P63261	Acetyl (Protein N-term)	Non-cleaved	MEEEIAALVIDNGSGMCK	M	E	-	-	-	-	x	-	Position 1	Removed - alternate	-	-
3	Q99832	Acetyl (Protein N-term)	Non-cleaved	MMPTPVILLK	M	M	-	-	-	-	x	-	Position 1	Removed - alternate	-	-
5	P62937	Acetyl (Protein N-term)	cleaved	VNPTVFFDIAVDGEPLGR	V	N	-	-	-	-	-	x	Position 1 + 2	Removed - alternate	-	-
5	P31943	Acetyl (Protein N-term)	cleaved	MLGTEGGEGFVVK	M	L	-	-	-	-	x	-	Position 1 + 2	Removed - alternate	-	-
5	P46782	Acetyl (Protein N-term)	cleaved	TEWETAAPAVAETPDIK	T	E	-	-	-	-	x	-	Position 1 + 2	Removed - alternate	-	-
5	P63261	Acetyl (Protein N-term)	cleaved	EEEIAALVIDNGSGMCK	E	E	-	-	-	-	x	x	Position 1 + 2	Removed - alternate	-	-
5	P52597	Acetyl (Protein N-term)	cleaved	MLGPEGGEGFVVK	M	L	-	-	-	-	x	-	Position 1 + 2	Removed - alternate	-	-
5	P05141	Acetyl (Protein N-term)	cleaved	TDAAVSFAK	T	D	-	-	-	-	x	x	Position 1 + 2	Removed - alternate	-	-
5	Q9BV86	Acetyl (Protein N-term)	cleaved	TSEVIEDEKQFYSK	T	S	-	-	-	-	x	-	Position 1 + 2	Removed - alternate	-	-
5	P38919	Acetyl (Protein N-term)	cleaved	ATTATMATSGSAR	A	T	-	-	-	-	-	x	Position 1 + 2	Removed - alternate	-	-
5	P06454	Acetyl (Protein N-term)	cleaved	SDAAVDTSSEITTK	S	D	-	-	-	-	x	-	Position 1 + 2	Removed - alternate	-	-
5	P62877	Acetyl (Protein N-term)	cleaved	AAAMDVDTPSGTNSGAGK	A	A	-	-	-	-	x	x	Position 1 + 2	Removed - alternate	-	-
5	P12236	Acetyl (Protein N-term)	cleaved	TEQAISFAK	T	E	-	-	-	-	x	x	Position 1 + 2	Removed - alternate	-	-
5	Q9GZS3	Acetyl (Protein N-term)	cleaved	TNQYGILFK	T	N	-	-	-	-	x	-	Position 1 + 2	Removed - alternate	-	-
5	P60709	Acetyl (Protein N-term)	cleaved	DDDIAALVVDNGSGMCK	D	D	-	-	-	-	x	x	Position 1 + 2	Removed - alternate	-	-
5	P62253	Acetyl (Protein N-term)	cleaved	TELQSALLLR	T	E	-	-	-	-	x	-	Position 1 + 2	Removed - alternate	-	-
5	Q0VGL1	Acetyl (Protein N-term)	cleaved	TSALTQGLER	T	S	-	-	-	-	x	-	Position 1 + 2	Removed - alternate	-	-
5	Q2TAY7	Acetyl (Protein N-term)	cleaved	SIEIESSDVIR	S	I	-	-	-	-	x	x	Position 1 + 2	Removed - alternate	-	-
6	P09382	Acetyl (Protein N-term)	cleaved	ACGLVASNLNLKPGECLR	A	C	-	-	-	-	x	x	Position 2	Removed	-	-
6	P16401	Acetyl (Protein N-term)	cleaved	SETAPAETATPAPVEK	S	E	-	-	-	-	x	-	Position 2	Removed	-	-
6	P41091	Acetyl (Protein N-term)	cleaved	AGGEAGVTLGQPHLSR	A	G	-	-	-	-	x	-	Position 2	Removed	-	-
6	P60981	Acetyl (Protein N-term)	cleaved	ASGVQVADEVCR	A	S	-	-	-	-	x	x	Position 2	Removed	-	-
6	P23528	Acetyl (Protein N-term)	cleaved	ASGVAVSDGVIK	A	S	-	-	-	-	x	x	Position 2	Removed	-	-
6	O75822	Acetyl (Protein N-term)	cleaved	AAAAAAAGDSDSWDADAFSVEDPVRK	A	A	-	-	-	-	x	x	Position 2	Removed	-	-
6	Q15020	Acetyl (Protein N-term)	cleaved	ATAAETSASEPEAESK	A	T	-	-	-	-	-	x	Position 2	Removed	-	-
6	P55072	Acetyl (Protein N-term)	cleaved	ASGADSKGDDLSTAILK	A	S	-	-	-	-	x	x	Position 2	Removed	-	-
6	P07741	Acetyl (Protein N-term)	cleaved	ADSELQLVEQR	A	D	-	-	-	-	x	-	Position 2	Removed	-	-
6	O75607	Acetyl (Protein N-term)	cleaved	AAGTAAALAFLSQESR	A	A	-	-	-	-	x	x	Position 2	Removed	-	-
6	P78371	Acetyl (Protein N-term)	cleaved	ASLSLAPVNIFK	A	S	-	-	-	-	x	x	Position 2	Removed	-	-
6	Q13263	Acetyl (Protein N-term)	cleaved	AASAAAASAAAASAASGSPGPGEGSAGGEKR	A	A	-	-	-	-	x	x	Position 2	Removed	-	-
6	Q15424	Acetyl (Protein N-term)	cleaved	AETLSGLGDSGAAGAAALSSASSETGTR	A	E	-	-	-	-	x	-	Position 2	Removed	-	-
6	Q86U42	Acetyl (Protein N-term)	cleaved	AAAAAAAAAAGAAGGR	A	A	-	-	-	-	x	x	Position 2	Removed	-	-
6	P51610	Acetyl (Protein N-term)	cleaved	ASAVSPANLPAVLLQPR	A	S	-	-	-	-	x	-	Position 2	Removed	-	-
6	Q9NS69	Acetyl (Protein N-term)	cleaved	AAAVAAAGAGEPQSPDELLPK	A	A	-	-	-	-	x	x	Position 2	Removed	-	-
6	O95197	Acetyl (Protein N-term)	cleaved	AEPSAATQSHSISSSSFGAEPSAPGGGGSPGACPALGTK	A	E	-	-	-	-	x	x	Position 2	Removed	-	-
6	Q99733	Acetyl (Protein N-term)	cleaved	ADHSFSDGVPSDSVEAAK	A	D	-	-	-	-	x	-	Position 2	Removed	-	-
6	Q9UMX0	Acetyl (Protein N-term)	cleaved	AESGESGGPPGSQDSAAGAEGAGAPAAAASAEPK	A	E	-	-	-	-	x	-	Position 2	Removed	-	-
6	Q9Y5S9	Acetyl (Protein N-term)	cleaved	ADVLDLHEAGGEDFAMDEDGDESIHK	A	D	-	-	-	-	x	-	Position 2	Removed	-	-
6	P25398	Acetyl (Protein N-term)	cleaved	AEEGIAAGGVMDVNTALQEVLK	A	E	-	-	-	-	x	x	Position 2	Removed	-	-
6	P20700	Acetyl (Protein N-term)	cleaved	ATATPVPPR	A	T	-	-	-	-	-	x	Position 2	Removed	-	-
6	O00148	Acetyl (Protein N-term)	cleaved	AEQDVENDLLDYDEEEEPQAPQESTPAPPK	A	E	-	-	-	-	x	x	Position 2	Removed	-	-
6	P52565	Acetyl (Protein N-term)	cleaved	AEQEPTAEQLAQIAAENEEDEHSVNYKPPAQK	A	E	-	-	-	-	x	x	Position 2	Removed	-	-
6	Q01469	Acetyl (Protein N-term)	cleaved	ATVQQLEGR	A	T	-	-	-	-	-	x	Position 2	Removed	-	-
6	P21796	Acetyl (Protein N-term)	cleaved	AVPPTYADLGK	A	V	-	-	-	-	x	-	Position 2	Removed	-	-
6	P62158	Acetyl (Protein N-term)	cleaved	ADQLTEEQIAEFK	A	D	-	-	-	-	x	x	Position 2	Removed	-	-
6	Q9HB71	Acetyl (Protein N-term)	cleaved	ASEELQKDLEEVK	A	S	-	-	-	-	x	x	Position 2	Removed	-	-
6	Q8WVM8	Acetyl (Protein N-term)	cleaved	AAAAAATAAAAASIR	A	A	-	-	-	-	x	x	Position 2	Removed	-	-
6	Q02978	Acetyl (Protein N-term)	cleaved	AATASAGAGGIDGKPR	A	A	-	-	-	-	-	x	Position 2	Removed	-	-
6	P48643	Acetyl (Protein N-term)	cleaved	ASMGTLAFDEYGRPFLIIK	A	S	-	-	-	-	x	x	Position 2	Removed	-	-
6	O00410	Acetyl (Protein N-term)	cleaved	AAAAAEQQQFYLLLGNLLSPDNVVR	A	A	-	-	-	-	-	x	Position 2	Removed	-	-
6	Q9Y285	Acetyl (Protein N-term)	cleaved	ADGQVAELLLR	A	D	-	-	-	-	x	x	Position 2	Removed	-	-
6	P30153	Acetyl (Protein N-term)	cleaved	AAADGDDSLYPIAVLIDELR	A	A	-	-	-	-	-	x	Position 2	Removed	-	-
6	Q9UBQ5	Acetyl (Protein N-term)	cleaved	AMFEQMR	A	M	-	-	-	-	x	x	Position 2	Removed	-	-
6	P28482	Acetyl (Protein N-term)	cleaved	AAAAAAGAGPEMVR	A	A	-	-	-	-	x	-	Position 2	Removed	-	-
6	Q01518	Acetyl (Protein N-term)	cleaved	ADMQNLVER	A	D	-	-	-	-	-	x	Position 2	Removed	-	-
6	Q9UNS2	Acetyl (Protein N-term)	cleaved	ASALEQFVNSVR	A	S	-	-	-	-	x	x	Position 2	Removed	-	-
6	O00299	Acetyl (Protein N-term)	cleaved	AEEQPQVELFVK	A	E	-	-	-	-	x	-	Position 2	Removed	-	-
6	P62826	Acetyl (Protein N-term)	cleaved	AAQGEPQVQFK	A	A	-	-	-	-	x	-	Position 2	Removed	-	-
6	Q08945	Acetyl (Protein N-term)	cleaved	AETLEFNDVYQEVK	A	E	-	-	-	-	x	x	Position 2	Removed	-	-
6	P27708	Acetyl (Protein N-term)	cleaved	AALVLEDGSVLR	A	A	-	-	-	-	x	x	Position 2	Removed	-	-
6	Q96A72	Acetyl (Protein N-term)	cleaved	AVASDFYLR	A	V	-	-	-	-	x	-	Position 2	Removed	-	-
6	P47897	Acetyl (Protein N-term)	cleaved	AALDSLSLFTSLGLSEQK	A	A	-	-	-	-	x	x	Position 2	Removed	-	-
6	Q9NPD3	Acetyl (Protein N-term)	cleaved	AGLELLSDQGYR	A	G	-	-	-	-	x	-	Position 2	Removed	-	-
6	P52434	Acetyl (Protein N-term)	cleaved	AGILFEDIFDVK	A	G	-	-	-	-	-	x	Position 2	Removed	-	-
6	Q15691	Acetyl (Protein N-term)	cleaved	AVNVYSTSVTSDNLSR	A	V	-	-	-	-	x	x	Position 2	Removed	-	-
6	P26641	Acetyl (Protein N-term)	cleaved	AAGTLYTYPENWR	A	A	-	-	-	-	x	x	Position 2	Removed	-	-
6	P47755	Acetyl (Protein N-term)	cleaved	ADLEEQLSDEEKVR	A	D	-	-	-	-	x	x	Position 2	Removed	-	-
6	O00231	Acetyl (Protein N-term)	cleaved	AAAAVVEFQR	A	A	-	-	-	-	x	-	Position 2	Removed	-	-
6	Q15637	Acetyl (Protein N-term)	cleaved	ATGANATPLDFPSK	A	T	-	-	-	-	x	-	Position 2	Removed	-	-
6	P12270	Acetyl (Protein N-term)	cleaved	AAVLQQVLER	A	A	-	-	-	-	x	x	Position 2	Removed	-	-
6	P25205	Acetyl (Protein N-term)	cleaved	AGTVVLDDVELR	A	G	-	-	-	-	x	x	Position 2	Removed	-	-
6	P78347	Acetyl (Protein N-term)	cleaved	AQVAMSTLPVEDEESSESR	A	Q	-	-	-	-	x	-	Position 2	Removed	-	-
6	Q09028	Acetyl (Protein N-term)	cleaved	ADKEAAFDDAVEER	A	D	-	-	-	-	x	-	Position 2	Removed	-	-
6	O14737	Acetyl (Protein N-term)	cleaved	ADEELEALRR	A	D	-	-	-	-	x	-	Position 2	Removed	-	-
6	O95456	Acetyl (Protein N-term)	cleaved	AATFFGEVVK	A	A	-	-	-	-	x	x	Position 2	Removed	-	-
6	P35269	Acetyl (Protein N-term)	cleaved	AALGPSSQNVTEYVVR	A	A	-	-	-	-	x	x	Position 2	Removed	-	-
6	P42566	Acetyl (Protein N-term)	cleaved	AAAAQLSLTQLSSGNPVYEK	A	A	-	-	-	-	x	-	Position 2	Removed	-	-
6	P45974	Acetyl (Protein N-term)	cleaved	AELSEEALLSVLPTIR	A	E	-	-	-	-	x	x	Position 2	Removed	-	-
6	P62195	Acetyl (Protein N-term)	cleaved	ALDGPEQMELEEGK	A	L	-	-	-	-	-	x	Position 2	Removed	-	-
6	Q9NRX4	Acetyl (Protein N-term)	cleaved	AVADLALIPDVDIDSDGVFK	A	V	-	-	-	-	x	-	Position 2	Removed	-	-
6	Q9NWT6	Acetyl (Protein N-term)	cleaved	AATAAEAVASGSGEPR	A	A	-	-	-	-	x	-	Position 2	Removed	-	-
6	Q9Y4Y9	Acetyl (Protein N-term)	cleaved	AANATTNPSQLLPLELVDK	A	A	-	-	-	-	x	x	Position 2	Removed	-	-
6	Q9Y5J9	Acetyl (Protein N-term)	cleaved	AELGEADEAELQR	A	E	-	-	-	-	x	-	Position 2	Removed	-	-
6	P07737	Acetyl (Protein N-term)	cleaved	AGWNAYIDNLMADGTCQDAAIVGYK	A	G	-	-	-	-	x	x	Position 2	Removed	-	-
6	Q96P70	Acetyl (Protein N-term)	cleaved	AAAAAAGAASGLPGPVAQGLK	A	A	-	-	-	-	x	-	Position 2	Removed	-	-
6	O60869	Acetyl (Protein N-term)	cleaved	AESDWDTVTVLR	A	E	-	-	-	-	x	-	Position 2	Removed	-	-
6	Q8WUM4	Acetyl (Protein N-term)	cleaved	ATFISVQLK	A	T	-	-	-	-	x	-	Position 2	Removed	-	-
6	P56134	Acetyl (Protein N-term)	cleaved	ASVGECPAPVPVK	A	S	-	-	-	-	x	-	Position 2	Removed	-	-
6	P00338	Acetyl (Protein N-term)	cleaved	ATLKDQLIYNLLK	A	T	-	-	-	-	x	-	Position 2	Removed	-	-
6	Q9NP79	Acetyl (Protein N-term)	cleaved	AALAPLPPLPAQFK	A	A	-	-	-	-	x	-	Position 2	Removed	-	-
6	P61106	Acetyl (Protein N-term)	cleaved	ATAPYNYSYIFK	A	T	-	-	-	-	x	x	Position 2	Removed	-	-
6	P52272	Acetyl (Protein N-term)	cleaved	AAGVEAAAEVAATEIK	A	A	-	-	-	-	x	x	Position 2	Removed	-	-
6	P22234	Acetyl (Protein N-term)	cleaved	ATAEVLNIGK	A	T	-	-	-	-	x	x	Position 2	Removed	-	-
6	Q96I24	Acetyl (Protein N-term)	cleaved	AELVQGQSAPVGMK	A	E	-	-	-	-	x	-	Position 2	Removed	-	-
6	P42285	Acetyl (Protein N-term)	cleaved	ADAFGDELFSVFEGDSTTAAGTK	A	D	-	-	-	-	-	x	Position 2	Removed	-	-
6	Q86VP6	Acetyl (Protein N-term)	cleaved	ASASYHISNLLEK	A	S	-	-	-	-	x	-	Position 2	Removed	-	-
6	O60832	Acetyl (Protein N-term)	cleaved	ADAEVIILPK	A	D	-	-	-	-	x	-	Position 2	Removed	-	-
6	Q13838	Acetyl (Protein N-term)	cleaved	AENDVDNELLDYEDDEVETAAGGDGAEAPAK	A	E	-	-	-	-	x	-	Position 2	Removed	-	-
6	Q99471	Acetyl (Protein N-term)	cleaved	AQSINITELNLPQLEMLK	A	Q	-	-	-	-	x	x	Position 2	Removed	-	-
6	P12955	Acetyl (Protein N-term)	cleaved	AAATGPSFWLGNETLK	A	A	-	-	-	-	x	-	Position 2	Removed	-	-
6	P48637	Acetyl (Protein N-term)	cleaved	ATNWGSLLQDK	A	T	-	-	-	-	x	-	Position 2	Removed	-	-
6	Q01658	Acetyl (Protein N-term)	cleaved	ASSSGNDDDLTIPR	A	S	-	-	-	-	x	-	Position 2	Removed	-	-
6	Q9NUU7	Acetyl (Protein N-term)	cleaved	ATDSWALAVDEQEAAVK	A	T	-	-	-	-	x	-	Position 2	Removed	-	-
6	Q9NWH9	Acetyl (Protein N-term)	cleaved	AAATGAVAASAASGQAEGK	A	A	-	-	-	-	x	x	Position 2	Removed	-	-
6	O15294	Acetyl (Protein N-term)	cleaved	ASSVGNVADSTEPTKR	A	S	-	-	-	-	-	x	Position 2	Removed	-	-
6	O75934	Acetyl (Protein N-term)	cleaved	AGTGLVAGEVVVDALPYFDQGYEAPGVR	A	G	-	-	-	-	x	x	Position 2	Removed	-	-
6	O60232	Acetyl (Protein N-term)	cleaved	ALNGAEVDDFSWEPPTEAETK	A	L	-	-	-	-	x	-	Position 2	Removed	-	-
6	O95926	Acetyl (Protein N-term)	cleaved	AAIAASEVLVDSAEEGSLAAAAELAAQK	A	A	-	-	-	-	-	x	Position 2	Removed	-	-
6	P62310	Acetyl (Protein N-term)	cleaved	ADDVDQQQTTNTVEEPLDLIR	A	D	-	-	-	-	x	x	Position 2	Removed	-	-
6	Q96KQ7	Acetyl (Protein N-term)	cleaved	AAAAGAAAAAAAEGEAPAEMGALLLEK	A	A	-	-	-	-	x	x	Position 2	Removed	-	-
6	Q9BTD8	Acetyl (Protein N-term)	cleaved	AGAGPAPGLPGAGGPVVPGPGAGIPGK	A	G	-	-	-	-	x	-	Position 2	Removed	-	-
6	Q9H993	Acetyl (Protein N-term)	cleaved	AVVPASLSGQDVGSFAYLTIK	A	V	-	-	-	-	x	-	Position 2	Removed	-	-
6	Q9Y5Q8	Acetyl (Protein N-term)	cleaved	AAEAADLGLGAAVPVELR	A	A	-	-	-	-	x	x	Position 2	Removed	-	-
6	O43264	Acetyl (Protein N-term)	cleaved	ASFVTEVLAHSGR	A	S	-	-	-	-	x	x	Position 2	Removed	-	-
6	P14550	Acetyl (Protein N-term)	cleaved	AASCVLLHTGQK	A	A	-	-	-	-	-	x	Position 2	Removed	-	-
6	Q00796	Acetyl (Protein N-term)	cleaved	AAAAKPNNLSLVVHGPGDLR	A	A	-	-	-	-	x	-	Position 2	Removed	-	-
6	Q4VC31	Acetyl (Protein N-term)	cleaved	AAPSGGVNCEEFAEFQELLK	A	A	-	-	-	-	x	-	Position 2	Removed	-	-
6	Q7Z7K0	Acetyl (Protein N-term)	cleaved	ALDPADQHLR	A	L	-	-	-	-	-	x	Position 2	Removed	-	-
6	Q9Y6C9	Acetyl (Protein N-term)	cleaved	ADAASQVLLGSGLTILSQPLMYVK	A	D	-	-	-	-	-	x	Position 2	Removed	-	-
6	P09012	Acetyl (Protein N-term)	cleaved	AVPETRPNHTIYINNLNEK	A	V	-	-	-	-	x	x	Position 2	Removed	-	-
6	Q9UIA9	Acetyl (Protein N-term)	cleaved	ADHVQSLAQLENLCK	A	D	-	-	-	-	x	x	Position 2	Removed	-	-
6	P52907	Acetyl (Protein N-term)	cleaved	ADFDDRVSDEEKVR	A	D	-	-	-	-	x	-	Position 2	Removed	-	-
6	P63313	Acetyl (Protein N-term)	cleaved	ADKPDMGEIASFDK	A	D	-	-	-	-	x	x	Position 2	Removed	-	-
6	O60518	Acetyl (Protein N-term)	cleaved	AATASAGVPATVSEK	A	A	-	-	-	-	x	-	Position 2	Removed	-	-
6	O60925	Acetyl (Protein N-term)	cleaved	AAPVDLELKK	A	A	-	-	-	-	x	-	Position 2	Removed	-	-
6	P55209	Acetyl (Protein N-term)	cleaved	ADIDNKEQSELDQDLDDVEEVEEEETGEETK	A	D	-	-	-	-	x	-	Position 2	Removed	-	-
6	P61019	Acetyl (Protein N-term)	cleaved	AYAYLFK	A	Y	-	-	-	-	x	x	Position 2	Removed	-	-
6	Q15650	Acetyl (Protein N-term)	cleaved	AVAGAVSGEPLVHWCTQQLR	A	V	-	-	-	-	x	-	Position 2	Removed	-	-
6	Q16254	Acetyl (Protein N-term)	cleaved	AEAGPQAPPPPGTPSR	A	E	-	-	-	-	x	-	Position 2	Removed	-	-
6	Q8NEJ9	Acetyl (Protein N-term)	cleaved	AALGVLESDLPSAVTLLK	A	A	-	-	-	-	x	x	Position 2	Removed	-	-
6	Q8TAT6	Acetyl (Protein N-term)	cleaved	AESIIIR	A	E	-	-	-	-	x	-	Position 2	Removed	-	-
6	Q92785	Acetyl (Protein N-term)	cleaved	AAVVENVVK	A	A	-	-	-	-	x	-	Position 2	Removed	-	-
6	Q96AE4	Acetyl (Protein N-term)	cleaved	ADYSTVPPPSSGSAGGGGGGGGGGGVNDAFK	A	D	-	-	-	-	x	-	Position 2	Removed	-	-
6	Q96BR5	Acetyl (Protein N-term)	cleaved	AGMVDFQDEEQVK	A	G	-	-	-	-	x	-	Position 2	Removed	-	-
6	Q96C01	Acetyl (Protein N-term)	cleaved	AELQQLR	A	E	-	-	-	-	-	x	Position 2	Removed	-	-
6	Q9Y5J7	Acetyl (Protein N-term)	cleaved	AAQIPESDQIK	A	A	-	-	-	-	x	-	Position 2	Removed	-	-
6	Q9BY77	Acetyl (Protein N-term)	cleaved	ADISLDELIR	A	D	-	-	-	-	x	x	Position 2	Removed	-	-
6	P27816	Acetyl (Protein N-term)	cleaved	ADLSLADALTEPSPDIEGEIK	A	D	-	-	-	-	x	x	Position 2	Removed	-	-
6	Q96JB2	Acetyl (Protein N-term)	cleaved	AEAALLLLPEAAAER	A	E	-	-	-	-	x	x	Position 2	Removed	-	-
6	Q00610	Acetyl (Protein N-term)	cleaved	AQILPIR	A	Q	-	-	-	-	x	x	Position 2	Removed	-	-
6	O76003	Acetyl (Protein N-term)	cleaved	AAGAAEAAVAAVEEVGSAGQFEELLR	A	A	-	-	-	-	-	x	Position 2	Removed	-	-
6	Q16401	Acetyl (Protein N-term)	cleaved	AAQALALLR	A	A	-	-	-	-	x	-	Position 2	Removed	-	-
6	P62140	Acetyl (Protein N-term)	cleaved	ADGELNVDSLITR	A	D	-	-	-	-	x	x	Position 2	Removed	-	-
6	Q8IZP0	Acetyl (Protein N-term)	cleaved	AELQMLLEEEIPSGK	A	E	-	-	-	-	x	-	Position 2	Removed	-	-
6	Q9Y5B9	Acetyl (Protein N-term)	cleaved	AVTLDKDAYYR	A	V	-	-	-	-	x	-	Position 2	Removed	-	-
6	Q9HCN4	Acetyl (Protein N-term)	cleaved	AASAAAAELQASGGPR	A	A	-	-	-	-	x	-	Position 2	Removed	-	-
6	Q14498	Acetyl (Protein N-term)	cleaved	ADDIDIEAMLEAPYK	A	D	-	-	-	-	x	x	Position 2	Removed	-	-
6	Q14764	Acetyl (Protein N-term)	cleaved	ATEEFIIR	A	T	-	-	-	-	x	x	Position 2	Removed	-	-
6	Q96KP4	Acetyl (Protein N-term)	cleaved	AALTTLFK	A	A	-	-	-	-	x	x	Position 2	Removed	-	-
6	O15305	Acetyl (Protein N-term)	cleaved	AAPGPALCLFDVDGTLTAPR	A	A	-	-	-	-	x	x	Position 2	Removed	-	-
6	Q15437	Acetyl (Protein N-term)	cleaved	ATYLEFIQQNEER	A	T	-	-	-	-	x	-	Position 2	Removed	-	-
6	Q4V328	Acetyl (Protein N-term)	cleaved	AQALSEEEFQR	A	Q	-	-	-	-	x	-	Position 2	Removed	-	-
6	Q9H3P7	Acetyl (Protein N-term)	cleaved	AAVLNAER	A	A	-	-	-	-	-	x	Position 2	Removed	-	-
6	Q9NY33	Acetyl (Protein N-term)	cleaved	ADTQYILPNDIGVSSLDCR	A	D	-	-	-	-	x	x	Position 2	Removed	-	-
6	Q9P253	Acetyl (Protein N-term)	cleaved	ASILDEYENSLSR	A	S	-	-	-	-	-	x	Position 2	Removed	-	-
6	P29692	Acetyl (Protein N-term)	cleaved	ATNFLAHEK	A	T	-	-	-	-	-	x	Position 2	Removed	-	-
6	O95249	Acetyl (Protein N-term)	cleaved	AAGTSSYWEDLRK	A	A	-	-	-	-	x	-	Position 2	Removed	-	-
6	Q92530	Acetyl (Protein N-term)	cleaved	AGLEVLFASAAPAITCR	A	G	-	-	-	-	x	x	Position 2	Removed	-	-
6	Q8N1G4	Acetyl (Protein N-term)	cleaved	AAAAVSESWPELELAER	A	A	-	-	-	-	x	-	Position 2	Removed	-	-
6	P78346	Acetyl (Protein N-term)	cleaved	AVFADLDLR	A	V	-	-	-	-	x	-	Position 2	Removed	-	-
6	P35080	Acetyl (Protein N-term)	cleaved	AGWQSYVDNLMCDGCCQEAAIVGYCDAK	A	G	-	-	-	-	x	x	Position 2	Removed	-	-
6	P40763	Acetyl (Protein N-term)	cleaved	AQWNQLQQLDTR	A	Q	-	-	-	-	x	-	Position 2	Removed	-	-
6	Q6Y7W6	Acetyl (Protein N-term)	cleaved	AAETQTLNFGPEWLR	A	A	-	-	-	-	x	x	Position 2	Removed	-	-
6	Q9BT67	Acetyl (Protein N-term)	cleaved	ALALAALAAVEPACGSR	A	L	-	-	-	-	x	-	Position 2	Removed	-	-
6	Q9H6Z4	Acetyl (Protein N-term)	cleaved	ADLANEEKPAIAPPVFVFQK	A	D	-	-	-	-	x	-	Position 2	Removed	-	-
6	Q13884	Acetyl (Protein N-term)	cleaved	AVAAAAAAAGPAGAGGGR	A	V	-	-	-	-	x	-	Position 2	Removed	-	-
6	P36873	Acetyl (Protein N-term)	cleaved	ADLDKLNIDSIIQR	A	D	-	-	-	-	x	x	Position 2	Removed	-	-
6	O43169	Acetyl (Protein N-term)	cleaved	ATAEASGSDGKGQEVETSVTYYR	A	T	-	-	-	-	x	-	Position 2	Removed	-	-
6	O43447	Acetyl (Protein N-term)	cleaved	AVANSSPVNPVVFFDVSIGGQEVGR	A	V	-	-	-	-	x	-	Position 2	Removed	-	-
6	Q6QNY1	Acetyl (Protein N-term)	cleaved	AAAAEGVLATR	A	A	-	-	-	-	x	-	Position 2	Removed	-	-
6	Q9Y6G5	Acetyl (Protein N-term)	cleaved	AVPAALILR	A	V	-	-	-	-	x	-	Position 2	Removed	-	-
6	P21980	Acetyl (Protein N-term)	cleaved	AEELVLER	A	E	-	-	-	-	x	x	Position 2	Removed	-	-
6	Q92922	Acetyl (Protein N-term)	cleaved	AAAAGGGGPGTAVGATGSGIAAAAAGLAVYR	A	A	-	-	-	-	-	x	Position 2	Removed	-	-
6	P51114	Acetyl (Protein N-term)	cleaved	AELTVEVR	A	E	-	-	-	-	x	x	Position 2	Removed	-	-
6	O00471	Acetyl (Protein N-term)	cleaved	ATTAELFEEPFVADEYIER	A	T	-	-	-	-	x	x	Position 2	Removed	-	-
6	Q8NC56	Acetyl (Protein N-term)	cleaved	AGLSDLELR	A	G	-	-	-	-	x	x	Position 2	Removed	-	-
6	Q96EV2	Acetyl (Protein N-term)	cleaved	AAALGASGGAGAGDDDFDQFDKPGAER	A	A	-	-	-	-	x	-	Position 2	Removed	-	-
6	Q9BWQ6	Acetyl (Protein N-term)	cleaved	ASADELTFHEFEEATNLLADTPDAATTSR	A	S	-	-	-	-	x	-	Position 2	Removed	-	-
6	Q9BXR0	Acetyl (Protein N-term)	cleaved	AGAATQASLESAPR	A	G	-	-	-	-	x	-	Position 2	Removed	-	-
6	Q9H920	Acetyl (Protein N-term)	cleaved	AAVVEVEVGGGAAGER	A	A	-	-	-	-	x	-	Position 2	Removed	-	-
6	Q9NVH1	Acetyl (Protein N-term)	cleaved	ATALSEEELDNEDYYSLLNVR	A	T	-	-	-	-	x	x	Position 2	Removed	-	-
6	Q9Y6M9	Acetyl (Protein N-term)	cleaved	AFLASGPYLTHQQK	A	F	-	-	-	-	x	-	Position 2	Removed	-	-
6	O15143	Acetyl (Protein N-term)	cleaved	AYHSFLVEPISCHAWNK	A	Y	-	-	-	-	x	-	Position 2	Removed	-	-
6	Q96B49	Acetyl (Protein N-term)	cleaved	ASSTVPVSAAGSANETPEIPDNVGDWLR	A	S	-	-	-	-	x	x	Position 2	Removed	-	-
6	Q9P000	Acetyl (Protein N-term)	cleaved	AALTAEHFAALQSLLK	A	A	-	-	-	-	x	-	Position 2	Removed	-	-
6	Q9UPY8	Acetyl (Protein N-term)	cleaved	AVNVYSTSVTSENLSR	A	V	-	-	-	-	x	-	Position 2	Removed	-	-
6	P04083	Acetyl (Protein N-term)	cleaved	AMVSEFLK	A	M	-	-	-	-	x	x	Position 2	Removed	-	-
6	P63241	Acetyl (Protein N-term)	cleaved	ADDLDFETGDAGASATFPMQCSALR	A	D	-	-	-	-	x	-	Position 2	Removed	-	-
6	Q13049	Acetyl (Protein N-term)	cleaved	AAAAASHLNLDALR	A	A	-	-	-	-	x	-	Position 2	Removed	-	-
6	O43324	Acetyl (Protein N-term)	cleaved	AAAAELSLLEK	A	A	-	-	-	-	x	-	Position 2	Removed	-	-
6	O75348	Acetyl (Protein N-term)	cleaved	ASQSQGIQQLLQAEK	A	S	-	-	-	-	x	x	Position 2	Removed	-	-
6	Q01081	Acetyl (Protein N-term)	cleaved	AEYLASIFGTEKDK	A	E	-	-	-	-	x	x	Position 2	Removed	-	-
6	P60660	Acetyl (Protein N-term)	cleaved	CDFTEDQTAEFK	C	D	-	-	-	-	x	x	Position 2	Removed	-	-
6	P58546	Acetyl (Protein N-term)	cleaved	CDKEFMWALK	C	D	-	-	-	-	x	-	Position 2	Removed	-	-
6	Q96P11	Acetyl (Protein N-term)	cleaved	GLYAAAAGVLAGVESR	G	L	-	-	-	-	x	-	Position 2	Removed	-	-
6	P16403	Acetyl (Protein N-term)	cleaved	SETAPAAPAAAPPAEK	S	E	-	-	-	-	x	x	Position 2	Removed	-	-
6	P10412	Acetyl (Protein N-term)	cleaved	SETAPAAPAAPAPAEK	S	E	-	-	-	-	x	-	Position 2	Removed	-	-
6	Q9UQ80	Acetyl (Protein N-term)	cleaved	SGEDEQQEQTIAEDLVVTK	S	G	-	-	-	-	x	x	Position 2	Removed	-	-
6	Q01130	Acetyl (Protein N-term)	cleaved	SYGRPPPDVEGMTSLK	S	Y	-	-	-	-	x	-	Position 2	Removed	-	-
6	Q8NDC0	Acetyl (Protein N-term)	cleaved	SDEFSLADALPEHSPAK	S	D	-	-	-	-	x	x	Position 2	Removed	-	-
6	P20340	Acetyl (Protein N-term)	cleaved	STGGDFGNPLR	S	T	-	-	-	-	x	-	Position 2	Removed	-	-
6	P26368	Acetyl (Protein N-term)	cleaved	SDFDEFER	S	D	-	-	-	-	x	x	Position 2	Removed	-	-
6	Q7L2H7	Acetyl (Protein N-term)	cleaved	SVPAFIDISEEDQAAELR	S	V	-	-	-	-	x	x	Position 2	Removed	-	-
6	P47756	Acetyl (Protein N-term)	cleaved	SDQQLDCALDLMR	S	D	-	-	-	-	x	x	Position 2	Removed	-	-
6	O15400	Acetyl (Protein N-term)	cleaved	SYTPGVGGDPAQLAQR	S	Y	-	-	-	-	x	-	Position 2	Removed	-	-
6	O14745	Acetyl (Protein N-term)	cleaved	SADAAAGAPLPR	S	A	-	-	-	-	x	-	Position 2	Removed	-	-
6	P25788	Acetyl (Protein N-term)	cleaved	SSIGTGYDLSASTFSPDGR	S	S	-	-	-	-	x	-	Position 2	Removed	-	-
6	O43719	Acetyl (Protein N-term)	cleaved	SGTNLDGNDEFDEQLR	S	G	-	-	-	-	x	-	Position 2	Removed	-	-
6	O60664	Acetyl (Protein N-term)	cleaved	SADGAEADGSTQVTVEEPVQQPSVVDR	S	A	-	-	-	-	x	x	Position 2	Removed	-	-
6	P07384	Acetyl (Protein N-term)	cleaved	SEEIITPVYCTGVSAQVQK	S	E	-	-	-	-	x	-	Position 2	Removed	-	-
6	P33992	Acetyl (Protein N-term)	cleaved	SGFDDPGIFYSDSFGGDAQADEGQAR	S	G	-	-	-	-	x	-	Position 2	Removed	-	-
6	P60983	Acetyl (Protein N-term)	cleaved	SESLVVCDVAEDLVEK	S	E	-	-	-	-	x	x	Position 2	Removed	-	-
6	Q15102	Acetyl (Protein N-term)	cleaved	SGEENPASKPTPVQDVQGDGR	S	G	-	-	-	-	-	x	Position 2	Removed	-	-
6	Q92945	Acetyl (Protein N-term)	cleaved	SDYSTGGPPPGPPPPAGGGGGAGGAGGGPPPGPPGAGDR	S	D	-	-	-	-	x	-	Position 2	Removed	-	-
6	P46779	Acetyl (Protein N-term)	cleaved	SAHLQWMVVR	S	A	-	-	-	-	x	-	Position 2	Removed	-	-
6	P62269	Acetyl (Protein N-term)	cleaved	SLVIPEK	S	L	-	-	-	-	x	-	Position 2	Removed	-	-
6	P62873	Acetyl (Protein N-term)	cleaved	SELDQLRQEAEQLK	S	E	-	-	-	-	x	x	Position 2	Removed	-	-
6	P84090	Acetyl (Protein N-term)	cleaved	SHTILLVQPTK	S	H	-	-	-	-	x	x	Position 2	Removed	-	-
6	P49720	Acetyl (Protein N-term)	cleaved	SIMSYNGGAVMAMK	S	I	-	-	-	-	x	-	Position 2	Removed	-	-
6	Q9UMS4	Acetyl (Protein N-term)	cleaved	SLICSISNEVPEHPCVSPVSNHVYER	S	L	-	-	-	-	-	x	Position 2	Removed	-	-
6	P12956	Acetyl (Protein N-term)	cleaved	SGWESYYK	S	G	-	-	-	-	x	x	Position 2	Removed	-	-
6	P16989	Acetyl (Protein N-term)	cleaved	SEAGEATTTTTTTLPQAPTEAAAAAPQDPAPK	S	E	-	-	-	-	x	-	Position 2	Removed	-	-
6	P37198	Acetyl (Protein N-term)	cleaved	SGFNFGGTGAPTGGFTFGTAK	S	G	-	-	-	-	x	x	Position 2	Removed	-	-
6	P49959	Acetyl (Protein N-term)	cleaved	STADALDDENTFK	S	T	-	-	-	-	x	-	Position 2	Removed	-	-
6	Q12996	Acetyl (Protein N-term)	cleaved	SGDGATEQAAEYVPEK	S	G	-	-	-	-	x	-	Position 2	Removed	-	-
6	P30519	Acetyl (Protein N-term)	cleaved	SAEVETSEGVDESEKK	S	A	-	-	-	-	-	x	Position 2	Removed	-	-
6	P62879	Acetyl (Protein N-term)	cleaved	SELEQLRQEAEQLR	S	E	-	-	-	-	x	-	Position 2	Removed	-	-
6	P16152	Acetyl (Protein N-term)	cleaved	SSGIHVALVTGGNK	S	S	-	-	-	-	x	x	Position 2	Removed	-	-
6	P62318	Acetyl (Protein N-term)	cleaved	SIGVPIK	S	I	-	-	-	-	x	-	Position 2	Removed	-	-
6	Q6DKJ4	Acetyl (Protein N-term)	cleaved	SGFLEELLGEK	S	G	-	-	-	-	x	x	Position 2	Removed	-	-
6	Q13177	Acetyl (Protein N-term)	cleaved	SDNGELEDKPPAPPVR	S	D	-	-	-	-	x	x	Position 2	Removed	-	-
6	P62328	Acetyl (Protein N-term)	cleaved	SDKPDMAEIEKFDK	S	D	-	-	-	-	x	x	Position 2	Removed	-	-
6	P11387	Acetyl (Protein N-term)	cleaved	SGDHLHNDSQIEADFR	S	G	-	-	-	-	x	x	Position 2	Removed	-	-
6	P46940	Acetyl (Protein N-term)	cleaved	SAADEVDGLGVARPHYGSVLDNER	S	A	-	-	-	-	x	x	Position 2	Removed	-	-
6	Q9Y291	Acetyl (Protein N-term)	cleaved	SSLSEYAFR	S	S	-	-	-	-	x	-	Position 2	Removed	-	-
6	Q96HC4	Acetyl (Protein N-term)	cleaved	SNYSVSLVGPAPWGFR	S	N	-	-	-	-	x	x	Position 2	Removed	-	-
6	P26640	Acetyl (Protein N-term)	cleaved	STLYVSPHPDAFPSLR	S	T	-	-	-	-	x	-	Position 2	Removed	-	-
6	O95807	Acetyl (Protein N-term)	cleaved	SGFLEGLR	S	G	-	-	-	-	x	x	Position 2	Removed	-	-
6	P13489	Acetyl (Protein N-term)	cleaved	SLDIQSLDIQCEELSDAR	S	L	-	-	-	-	x	x	Position 2	Removed	-	-
6	Q9BZK7	Acetyl (Protein N-term)	cleaved	SISSDEVNFLVYR	S	I	-	-	-	-	x	x	Position 2	Removed	-	-
6	P61803	Acetyl (Protein N-term)	cleaved	SASVVSVISR	S	A	-	-	-	-	x	x	Position 2	Removed	-	-
6	Q9BXS5	Acetyl (Protein N-term)	cleaved	SASAVYVLDLK	S	A	-	-	-	-	x	x	Position 2	Removed	-	-
6	P62820	Acetyl (Protein N-term)	cleaved	SSMNPEYDYLFK	S	S	-	-	-	-	x	x	Position 2	Removed	-	-
6	P42224	Acetyl (Protein N-term)	cleaved	SQWYELQQLDSK	S	Q	-	-	-	-	x	x	Position 2	Removed	-	-
6	Q4ZIN3	Acetyl (Protein N-term)	cleaved	SEHVEPAAPGPGPNGGGGGPAPAR	S	E	-	-	-	-	x	-	Position 2	Removed	-	-
6	Q92598	Acetyl (Protein N-term)	cleaved	SVVGLDVGSQSCYIAVAR	S	V	-	-	-	-	x	x	Position 2	Removed	-	-
6	Q96FX7	Acetyl (Protein N-term)	cleaved	SFVAYEELIK	S	F	-	-	-	-	x	x	Position 2	Removed	-	-
6	Q9BUN8	Acetyl (Protein N-term)	cleaved	SDIGDWFR	S	D	-	-	-	-	x	-	Position 2	Removed	-	-
6	Q9Y5Q9	Acetyl (Protein N-term)	cleaved	SGFSPELIDYLEGK	S	G	-	-	-	-	x	-	Position 2	Removed	-	-
6	P62136	Acetyl (Protein N-term)	cleaved	SDSEKLNLDSIIGR	S	D	-	-	-	-	x	-	Position 2	Removed	-	-
6	O60499	Acetyl (Protein N-term)	cleaved	SLEDPFFVVR	S	L	-	-	-	-	x	-	Position 2	Removed	-	-
6	O00165	Acetyl (Protein N-term)	cleaved	SLFDLFR	S	L	-	-	-	-	x	-	Position 2	Removed	-	-
6	O75431	Acetyl (Protein N-term)	cleaved	SLVAEAFVSQIAAAEPWPENATLYQQLK	S	L	-	-	-	-	-	x	Position 2	Removed	-	-
6	P08865	Acetyl (Protein N-term)	cleaved	SGALDVLQMKEEDVLK	S	G	-	-	-	-	x	x	Position 2	Removed	-	-
6	Q9NVI7	Acetyl (Protein N-term)	cleaved	SWLFGINK	S	W	-	-	-	-	x	x	Position 2	Removed	-	-
6	Q9Y241	Acetyl (Protein N-term)	cleaved	STDTGVSLPSYEEDQGSK	S	T	-	-	-	-	x	x	Position 2	Removed	-	-
6	P07355	Acetyl (Protein N-term)	cleaved	STVHEILCK	S	T	-	-	-	-	x	x	Position 2	Removed	-	-
6	Q16186	Acetyl (Protein N-term)	cleaved	TTSGALFPSLVPGSR	T	T	-	-	-	-	x	x	Position 2	Removed	-	-
6	O43491	Acetyl (Protein N-term)	cleaved	TTEVGSVSEVKK	T	T	-	-	-	-	-	x	Position 2	Removed	-	-
6	P08621	Acetyl (Protein N-term)	cleaved	TQFLPPNLLALFAPR	T	Q	-	-	-	-	-	x	Position 2	Removed	-	-
6	P46976	Acetyl (Protein N-term)	cleaved	TDQAFVTLTTNDAYAK	T	D	-	-	-	-	x	-	Position 2	Removed	-	-
6	O00151	Acetyl (Protein N-term)	cleaved	TTQQIDLQGPGPWGFR	T	T	-	-	-	-	x	-	Position 2	Removed	-	-
6	O95777	Acetyl (Protein N-term)	cleaved	TSALENYINR	T	S	-	-	-	-	x	x	Position 2	Removed	-	-
6	Q15436	Acetyl (Protein N-term)	cleaved	TTYLEFIQQNEER	T	T	-	-	-	-	x	x	Position 2	Removed	-	-
6	Q15125	Acetyl (Protein N-term)	cleaved	TTNAGPLHPYWPQHLR	T	T	-	-	-	-	x	-	Position 2	Removed	-	-
6	P55735	Acetyl (Protein N-term)	cleaved	VSVINTVDTSHEDMIHDAQMDYYGTR	V	S	-	-	-	-	x	-	Position 2	Removed	-	-
6	P49189	Acetyl (Protein N-term)	cleaved	STGTFVVSQPLNYR	S	T	-	-	-	-	x	x	Position 2	Removed - alternate	-	-
8	P54105	Unmodified	cleaved	MSFLKSFPPPGPAEGLLR	-	-	M	S	S	No	x	-	Position 2	Removed	xx	-
9	Q99460	Unmodified	cleaved	MITSAAGIISLLDEDEPQLK	-	-	M	I	I	Yes	x	-	Position 1	-	-	-
10	P01834	Unmodified	cleaved	TVAAPSVFIFPPSDEQLK	-	-	T	V	V	No	x	-	-	-	-	-
11	Q92575	Unmodified	cleaved	MLWFQGAIPAAIATAK	-	-	M	L	L	Yes	x	-	-	-	-	-
11	Q9Y6A9	Unmodified	cleaved	MLEHLSSLPTQMDYK	-	-	M	L	L	Yes	x	-	-	-	-	-
12	P31939	Unmodified	cleaved	MAPGQLALFSVSDK	-	-	M	A	A	Yes	x	-	Position 1	Removed - alternate	-	-
13	P49189	Unmodified	cleaved	MSTGTFVVSQPLNYR	-	-	M	S	S	No	x	-	Position 2	Removed - alternate	-	-
14	P56385	Unmodified	cleaved	MVPPVQVSPLIK	-	-	M	V	V	Yes	x	-	-	Removed - alternate	-	-
15	Q14974	Unmodified	cleaved	ELITILEK	-	-	E	L	-	-	x	-	Position 1	-	x	-
15	Q96HQ2	Unmodified	cleaved	VGGEAAAAVEELVSGVR	-	-	V	G	-	-	x	-	Position 1	-	x	-
15	P49591	Unmodified	cleaved	VLDLDLFR	-	-	V	L	-	-	x	-	Position 1	-	x	-
15	Q96FV9	Unmodified	cleaved	SPTPPLFSLPEAR	-	-	S	P	-	-	x	-	Position 1	-	x	-
16	Q9H1I8	Unmodified	cleaved	PALPLDQLQITHK	-	-	P	A	-	-	x	-	-	-	x	-
16	O00767	Unmodified	cleaved	PAHLLQDDISSSYTTTTTITAPPSR	-	-	P	A	-	-	x	-	-	-	x	-
16	O75369	Unmodified	cleaved	PVTEKDLAEDAPWK	-	-	P	V	-	-	x	-	-	-	x	-
16	O75886	Unmodified	cleaved	PLFTANPFEQDVEK	-	-	P	L	-	-	x	-	-	-	x	-
16	O95470	Unmodified	cleaved	PSTDLLMLK	-	-	P	S	-	-	x	-	-	-	x	-
16	P33908	Unmodified	cleaved	PVGGLLPLFSSPAGGVLGGGLGGGGGR	-	-	P	V	-	-	x	-	-	-	x	-
16	P51812	Unmodified	cleaved	PLAQLADPWQK	-	-	P	L	-	-	x	-	-	-	x	-
16	P55036	Unmodified	cleaved	VLESTMVCVDNSEYMR	-	-	V	L	-	-	x	x	-	-	x	-
16	Q6IA86	Unmodified	cleaved	VAPVLETSHVFCCPNR	-	-	V	A	-	-	x	-	-	-	x	-
16	Q8TF74	Unmodified	cleaved	PIPPPPPPPPGPPPPPTFHQANTEQPK	-	-	P	I	-	-	x	-	-	-	x	-
16	Q9NZB2	Unmodified	cleaved	GVQGFQDYIEK	-	-	G	V	-	-	x	-	-	-	x	-
16	Q9Y666	Unmodified	cleaved	PTNFTVVPVEAHADGGGDETAER	-	-	P	T	-	-	x	-	-	-	x	-
17	P62937	Unmodified	cleaved	VNPTVFFDIAVDGEPLGR	-	-	V	N	-	-	x	x	Position 1	Removed - alternate	-	-
17	P31939	Unmodified	cleaved	APGQLALFSVSDK	-	-	A	P	-	-	x	x	Position 1	Removed - alternate	-	-
17	P27694	Unmodified	cleaved	VGQLSEGAIAAIMQK	-	-	V	G	-	-	x	-	Position 1	Removed - alternate	-	-
17	P54819	Unmodified	cleaved	APSVPAAEPEYPK	-	-	A	P	-	-	x	x	Position 1	Removed - alternate	-	-
17	Q9UBE0	Unmodified	cleaved	VEKEEAGGGISEEEAAQYDR	-	-	V	E	-	-	-	x	Position 1	Removed - alternate	-	-
17	O00743	Unmodified	cleaved	APLDLDKYVEIAR	-	-	A	P	-	-	x	-	Position 1	Removed - alternate	-	-
18	P09382	Unmodified	cleaved	ACGLVASNLNLKPGECLR	-	-	A	C	-	-	x	-	Position 2	Removed	-	-
18	P16401	Unmodified	cleaved	SETAPAETATPAPVEK	-	-	S	E	-	-	-	x	Position 2	Removed	-	-
18	P30046	Unmodified	cleaved	PFLELDTNLPANR	-	-	P	F	-	-	-	x	Position 2	Removed	-	-
19	O15260	Unmodified	cleaved	GQNDLMGTAEDFADQFLR	-	-	G	Q	-	-	x	x	-	Removed	-	-
19	P14174	Unmodified	cleaved	PMFIVNTNVPR	-	-	P	M	-	-	x	x	-	Removed	-	-
19	O14579	Unmodified	cleaved	APPAPGPASGGSGEVDELFDVK	-	-	A	P	-	-	x	x	-	Removed	-	-
19	O43396	Unmodified	cleaved	VGVKPVGSDPDFQPELSGAGSR	-	-	V	G	-	-	x	-	-	Removed	-	-
19	O75190	Unmodified	cleaved	VDYYEVLGVQR	-	-	V	D	-	-	x	x	-	Removed	-	-
19	O75694	Unmodified	cleaved	PSSLLGAAMPASTSAAALQEALENAGR	-	-	P	S	-	-	x	-	-	Removed	-	-
19	P04075	Unmodified	cleaved	PYQYPALTPEQK	-	-	P	Y	-	-	-	x	-	Removed	-	-
19	P09211	Unmodified	cleaved	PPYTVVYFPVR	-	-	P	P	-	-	x	x	-	Removed	-	-
19	P09960	Unmodified	cleaved	PEIVDTCSLASPASVCR	-	-	P	E	-	-	x	-	-	Removed	-	-
19	P11908	Unmodified	cleaved	PNIVLFSGSSHQDLSQR	-	-	P	N	-	-	x	-	-	Removed	-	-
19	P13639	Unmodified	cleaved	VNFTVDQIR	-	-	V	N	-	-	x	x	-	Removed	-	-
19	P17174	Unmodified	cleaved	APPSVFAEVPQAQPVLVFK	-	-	A	P	-	-	x	x	-	Removed	-	-
19	P23381	Unmodified	cleaved	PNSEPASLLELFNSIATQGELVR	-	-	P	N	-	-	x	-	-	Removed	-	-
19	P30041	Unmodified	cleaved	PGGLLLGDVAPNFEANTTVGR	-	-	P	G	-	-	x	x	-	Removed	-	-
19	P30536	Unmodified	cleaved	APPWVPAMGFTLAPSLGCFVGSR	-	-	A	P	-	-	x	-	-	Removed	-	-
19	P37108	Unmodified	cleaved	VLLESEQFLTELTR	-	-	V	L	-	-	x	x	-	Removed	-	-
19	P49458	Unmodified	cleaved	PQYQTWEEFSR	-	-	P	Q	-	-	x	-	-	Removed	-	-
19	P51970	Unmodified	cleaved	PGIVELPTLEELKVDEVK	-	-	P	G	-	-	x	x	-	Removed	-	-
19	P60602	Unmodified	cleaved	PVAVGPYGQSQPSCFDR	-	-	P	V	-	-	x	-	-	Removed	-	-
19	P60903	Unmodified	cleaved	PSQMEHAMETMMFTFHK	-	-	P	S	-	-	x	-	-	Removed	-	-
19	P62942	Unmodified	cleaved	GVQVETISPGDGR	-	-	G	V	-	-	-	x	-	Removed	-	-
19	Q14061	Unmodified	cleaved	PGLVDSNPAPPESQEK	-	-	P	G	-	-	-	x	-	Removed	-	-
19	Q15459	Unmodified	cleaved	PAGPVQAVPPPPPVPTEPK	-	-	P	A	-	-	x	x	-	Removed	-	-
19	Q8NC51	Unmodified	cleaved	PGHLQEGFGCVVTNR	-	-	P	G	-	-	x	x	-	Removed	-	-
19	Q92783	Unmodified	cleaved	PLFATNPFDQDVEK	-	-	P	L	-	-	x	x	-	Removed	-	-
19	Q96IX5	Unmodified	cleaved	AGPESDAQYQFTGIK	-	-	A	G	-	-	x	x	-	Removed	-	-
19	Q9BZZ5	Unmodified	cleaved	PTVEELYR	-	-	P	T	-	-	-	x	-	Removed	-	-
19	Q9NR45	Unmodified	cleaved	PLELELCPGR	-	-	P	L	-	-	x	-	-	Removed	-	-
19	Q9Y3D0	Unmodified	cleaved	VGGGGVGGGLLENANPLIYQR	-	-	V	G	-	-	x	x	-	Removed	-	-
20	P56385	Unmodified	cleaved	VPPVQVSPLIK	-	-	V	P	-	-	x	-	-	Removed - alternate	-	-
a	Uniprot Accession Number
b	State of N-terminus of identified peptide
c	State of initiator methionine of identified peptide
d	Amino acid sequence of identified peptide
e	N-acetylated amino acid
f	Amino acid following the N-acetylated amino acid
g	N-terminal, unmodified amino acid
h	Amino acid following unmodified N-terminal amino acid
i	Amino acid following Arg/N rule
j	Peptide/Protein tagged for degradation according to Arg/N rule
k	Peptide identified in IEF fractionated sample
l	Peptide identified in unfractionated sample
m	Position of N-acetylation according to Uniprot (PubMed ID of evidence in Supplement XXX)
n	Initiator methionine removed or alternation according to Uniprot (PubMed ID of evidence in Supplement XXX)
o	N-terminus has not been described in the literature before according to Uniprot (xx: Novel non-cleavage of initiator methionine)
p	N-acetylation has not been described in the literature before according to Uniprot
IEF Total	IEF excl	Unfractionated Total	Unfrac excl	Overlap
34	30	5	1	4

## Sheet: S-2b
Group	Acca	Modificationsb	Initiator Mc	Sequenced	Acetylated AAe	Follow AA N-acetylf	Unmodified AAg	Follow AA unmodifiedh	Follow AA -Arg/Ni	Arg/Nj	IEFk	Unfractionatedl	N-acetylation-neXtProtm	Initiator Methionine neXtProtn	Novel N-termo	Novel N-acetylp	Novel N-termq	Novel N-acetylr	PRIDE Archive Number	Reference
1	NX_O60220	Acetyl (Protein N-term)	non-cleaved	MDSSSSSSAAGLGAVDPQLQHFIEVETQK	M	D	-	-	-	-	-	x	-	-	-	x	-	-	PXD001521	[42]
1	NX_O95639	Acetyl (Protein N-term)	non-cleaved	MQEIIASVDHIK	M	Q	-	-	-	-	x	-	-	-	-	x	-	x
1	NX_Q13287	Acetyl (Protein N-term)	non-cleaved	MEADKDDTQQILK	M	E	-	-	-	-	x	-	-	-	-	x	-	x
1	NX_Q8NEM7	Acetyl (Protein N-term)	non-cleaved	MQQALELALDR	M	Q	-	-	-	-	x	-	-	-	-	x	-	-	PXD001536	[43]
1	NX_Q9HBM1	Acetyl (Protein N-term)	non-cleaved	MVEDELALFDK	M	V	-	-	-	-	x	x	-	-	-	x	-	x
2	NX_O00268	Acetyl (Protein N-term)	cleaved	AAGSDLLDEVFFNSEVDEK	A	A	-	-	-	-	x	-	-	-	x	x	x	x
2	NX_O75534	Acetyl (Protein N-term)	cleaved	SFDPNLLHNNGHNGYPNGTSAALR	S	F	-	-	-	-	x	-	-	-	x	x	-	-	PXD001536	[43]
2	NX_P32780	Acetyl (Protein N-term)	cleaved	ATSSEEVLLIVK	A	T	-	-	-	-	x	-	-	-	x	x	-	-	PXD002091	[44]
2	NX_P34932	Acetyl (Protein N-term)	cleaved	SVVGIDLGFQSCYVAVAR	S	V	-	-	-	-	x	x	-	-	x	x	-	-	PXD001536	[43]
2	NX_P54725	Acetyl (Protein N-term)	cleaved	AVTITLK	A	V	-	-	-	-	x	-	-	-	x	x	-	-	PXD002091	[44]
2	NX_Q13435	Acetyl (Protein N-term)	cleaved	ATEHPEPPKAELQLPPPPPPGHYGAWAAQELQAK	A	T	-	-	-	-	x	-	-	-	x	x	-	-	PXD001536	[43]
2	NX_Q13526	Acetyl (Protein N-term)	cleaved	ADEEKLPPGWEK	A	D	-	-	-	-	x	-	-	-	x	x	-	-	PXD002091	[44]
2	NX_Q13948	Acetyl (Protein N-term)	cleaved	AANVGSMFQYWK	A	A	-	-	-	-	x	-	-	-	x	x	-	-	PXD002091	[44]
2	NX_Q15542	Acetyl (Protein N-term)	cleaved	AALAEEQTEVAVK	A	A	-	-	-	-	x	-	-	-	x	x	x	x
2	NX_Q5VZF2	Acetyl (Protein N-term)	cleaved	ALNVAPVR	A	L	-	-	-	-	x	-	-	-	x	x	-	-	PXD001282	[45]
2	NX_Q8TCE6	Acetyl (Protein N-term)	cleaved	AAAEVADTQLMLGVGLIEK	A	A	-	-	-	-	x	-	-	-	x	x	x	x
2	NX_Q8WU76	Acetyl (Protein N-term)	cleaved	SASGVLSFTQQGWEQVLAK	S	A	-	-	-	-	x	-	-	-	x	x	x	x
2	NX_Q8WUK0	Acetyl (Protein N-term)	cleaved	AATALLEAGLAR	A	A	-	-	-	-	x	x	-	-	x	x	-	-	PXD001521	[42]
2	NX_Q96CB8	Acetyl (Protein N-term)	cleaved	AATVNLELDPIFLK	A	A	-	-	-	-	x	-	-	-	x	x	x	x
2	NX_Q96FN4	Acetyl (Protein N-term)	cleaved	AHIPSGGAPAAGAAPMGPQYCVCK	A	H	-	-	-	-	x	-	-	-	x	x	x	x
2	NX_Q96MW1	Acetyl (Protein N-term)	cleaved	AAPSEVAAIAPGEGDGGGGGFGSWLDGR	A	A	-	-	-	-	x	-	-	-	x	x	-	-	PXD001536	[43]
2	NX_Q96MX6	Acetyl (Protein N-term)	cleaved	SAFEKPQIIAHIQK	S	A	-	-	-	-	x	-	-	-	x	x	-	-	PXD001536	[43]
2	NX_Q96P48	Acetyl (Protein N-term)	cleaved	AEAGDAALSVAEWLR	A	E	-	-	-	-	x	x	-	-	x	x	-	-	PXD001536	[43]
2	NX_Q96RE7	Acetyl (Protein N-term)	cleaved	AQTLQMEIPNFGNSILECLNEQR	A	Q	-	-	-	-	x	-	-	-	x	x	-	-	PXD002091	[44]
2	NX_Q9NQX3	Acetyl (Protein N-term)	cleaved	ATEGMILTNHDHQIR	A	T	-	-	-	-	x	-	-	-	x	x	-	-	PXD002091	[44]
2	NX_Q9NR56	Acetyl (Protein N-term)	cleaved	AVSVTPIR	A	V	-	-	-	-	x	-	-	-	x	x	-	-	PXD001282	[45]
2	NX_Q9NW68	Acetyl (Protein N-term)	cleaved	AEGEDVGWWR	A	E	-	-	-	-	x	-	-	-	x	x	x	x
2	NX_Q9UJY4	Acetyl (Protein N-term)	cleaved	AATAVAAAVAGTESAQGPPGPAASLELWLNK	A	A	-	-	-	-	x	-	-	-	x	x	-	-	PXD002091	[44]
2	NX_Q9Y2P8	Acetyl (Protein N-term)	cleaved	ATQAHSLSYAGCNFLR	A	T	-	-	-	-	x	-	-	-	x	x	-	-	PXD001536	[43]
2	NX_Q9Y5K5	Acetyl (Protein N-term)	cleaved	TGNAGEWCLMESDPGVFTELIK	T	G	-	-	-	-	x	-	-	-	x	x	x	x
2	NX_Q9Y6Q5	Acetyl (Protein N-term)	cleaved	SASAVFILDVK	S	A	-	-	-	-	x	-	-	-	x	x	x	x
3	NX_Q96S52	Acetyl (Protein N-term)	cleaved	AAAGAAATHLEVAR	A	A	-	-	-	-	x	-	-	Removed	-	x	-	-	PXD002091	[44]
4	NX_Q14974	Unmodified	cleaved	ELITILEK	-	-	E	L	-	-	x	-	Position 1	-	x	-	-	-
4	NX_Q96HQ2	Unmodified	cleaved	VGGEAAAAVEELVSGVR	-	-	V	G	-	-	x	-	Position 1	-	x	-	-	-
4	NX_P49591	Unmodified	cleaved	VLDLDLFR	-	-	V	L	-	-	x	-	Position 1	-	x	-	-	-
4	NX_Q96FV9	Unmodified	cleaved	SPTPPLFSLPEAR	-	-	S	P	-	-	x	-	Position 1	-	x	-	-	-
5	NX_Q9H1I8	Unmodified	cleaved	PALPLDQLQITHK	-	-	P	A	-	-	x	-	-	-	x	-	-	-
5	NX_O00767	Unmodified	cleaved	PAHLLQDDISSSYTTTTTITAPPSR	-	-	P	A	-	-	x	-	-	-	x	-	-	-
5	NX_O75369	Unmodified	cleaved	PVTEKDLAEDAPWK	-	-	P	V	-	-	x	-	-	-	x	-	-	-
5	NX_O75886	Unmodified	cleaved	PLFTANPFEQDVEK	-	-	P	L	-	-	x	-	-	-	x	-	-	-
5	NX_O95470	Unmodified	cleaved	PSTDLLMLK	-	-	P	S	-	-	x	-	-	-	x	-	-	-
5	NX_P33908	Unmodified	cleaved	PVGGLLPLFSSPAGGVLGGGLGGGGGR	-	-	P	V	-	-	x	-	-	-	x	-	-	-
5	NX_P51812	Unmodified	cleaved	PLAQLADPWQK	-	-	P	L	-	-	x	-	-	-	x	-	-	-
5	NX_P55036	Unmodified	cleaved	VLESTMVCVDNSEYMR	-	-	V	L	-	-	x	x	-	-	x	-	-	-
5	NX_Q6IA86	Unmodified	cleaved	VAPVLETSHVFCCPNR	-	-	V	A	-	-	x	-	-	-	x	-	-	-
5	NX_Q8TF74	Unmodified	cleaved	PIPPPPPPPPGPPPPPTFHQANTEQPK	-	-	P	I	-	-	x	-	-	-	x	-	x	-	PXD003924*	[46]
5	NX_Q9NZB2	Unmodified	cleaved	GVQGFQDYIEK	-	-	G	V	-	-	x	-	-	-	x	-	-	-
5	NX_Q9Y666	Unmodified	cleaved	PTNFTVVPVEAHADGGGDETAER	-	-	P	T	-	-	x	-	-	-	x	-	-	-
a	NeXtProt Accession Number
b	State of N-terminus of identified peptide
c	State of initiator methionine of identified peptide
d	Amino acid sequence of identified peptide
e	N-acetylated amino acid
f	Amino acid following the N-acetylated amino acid
g	N-terminal, unmodified amino acid
h	Amino acid following unmodified N-terminal amino acid
i	Amino acid following Methionine (Arg/N rule)
j	Peptide/Protein tagged for degradation according to Arg/N rule
k	Peptide identified in IEF fractionated sample
l	Peptide identified in unfractionated sample
m	Position of N-acetylation according to neXtProt
n	Initiator methionine removed or alternation according to neXtProt
o	N-terminus has not been described in the literature before according to neXtProt (xx: Novel non-cleavage of initiator methionine)
p	N-acetylation has not been described in the literature before according to neXtProt
q	N-terminus has not been described in the literature before according to PRIDE
r	N-acetylation has not been described in the literature before according to PRIDE
*	No FDR control for peptide identifications reported in Refrence
42. Vaca Jacome, A. S.; Rabilloud, T.; Schaeffer-Reiss, C.; Rompais, M.; Ayoub, D.; Lane, L.; Bairoch, A.; Van Dorsselaer, A.; Carapito, C. N-terminome analysis of the human mitochondrial proteome. Proteomics 2015, 15, 2519-2524.
43. Vizovišek, M.; Vidmar, R.; Van Quickelberghe, E.; Impens, F.; Andjelković, U.; Sobotič, B.; Stoka, V.; Gevaert, K.; Turk, B.; Fonović, M. Fast profiling of protease specificity reveals similar substrate specificities for cathepsins K, L and S. Proteomics 2015, 15, 2479-2490.
44. Gawron, D.; Ndah, E.; Gevaert, K.; Van Damme, P. Positional proteomics reveals differences in N-terminal proteoform stability. Mol Syst Biol [Online], 2016, 12. 858
45. Myklebust, L. M.; Van Damme, P.; Støve, S. I.; Dörfel, M. J.; Abboud, A.; Kalvik, T. V.; Grauffel, C.; Jonckheere, V.; Wu, Y.; Swensen, J.; Kaasa, H.; Liszczak, G.; Marmorstein, R.; Reuter, N.; Lyon, G. J.; Gevaert, K.; Arnesen, T. Biochemical and cellular analysis of Ogden syndrome reveals downstream Nt-acetylation defects. Hum Mol Genet 2015, 24, 1956-1976
46. Zhou, R.; Kuang, Y.; Zhou, J.; Du, X.; Li, J.; Shi, J.; Haburcak, R.; Xu, B. Nanonets Collect Cancer Secretome from Pericellular Space PloS one [Online], 2016, 11. e0154126.
